# Supplementary material
Source: publisher figshare collection journal article supplement (https://acs.figshare.com/ndownloader/files/4594198)
Supplement: Supplementary file 1 [file 4594198]

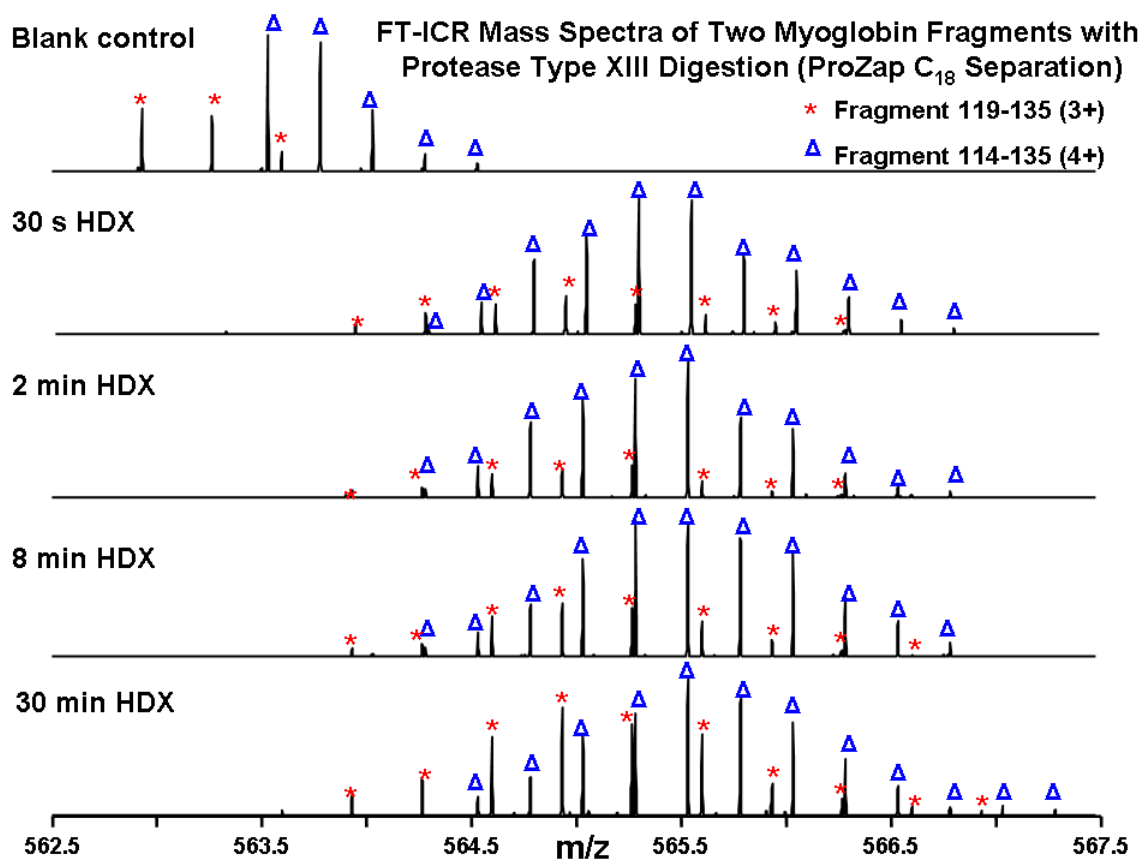

**Supplemental Figure 1.** Micro-ESI FT-ICR mass spectra of myoglobin fragments 119-135 (\*, 3+ charge state, monoisotopic  $m/z$  562.935) and 114-135 ( $\Delta$ , 4+ charge state, monoisotopic  $m/z$  563.538). Those fragments were generated by protease type XIII digestion and LC separation with a ProZap C<sub>18</sub> column. Their isotopic distributions overlap after certain periods of deuterium incubation. High-resolution FT-ICR MS detection, combined with our data analysis algorithm, enables accurate assignment of the fragments and accurate calculation of deuterium incorporation for each fragment.
